# Supplementary material for: Interaction of genotype-ecological type-plant spacing configuration in sorghum [Sorghum bicolor (L.) Moench] in China
Source: Frontiers journal article supplement (doi:10.3389/fpls.2022.1076854), 2023-01-12

**Supplementary Figure S1** Configuration of the effect of six plant spacing pattern (row space mode and in-row plant space) on sorghum grain yield in four sites (JG, LS, HZ, and GX site) in 2020 and 2021. “\*” indicates significant differences ( $p < 0.05$ ) within the group.

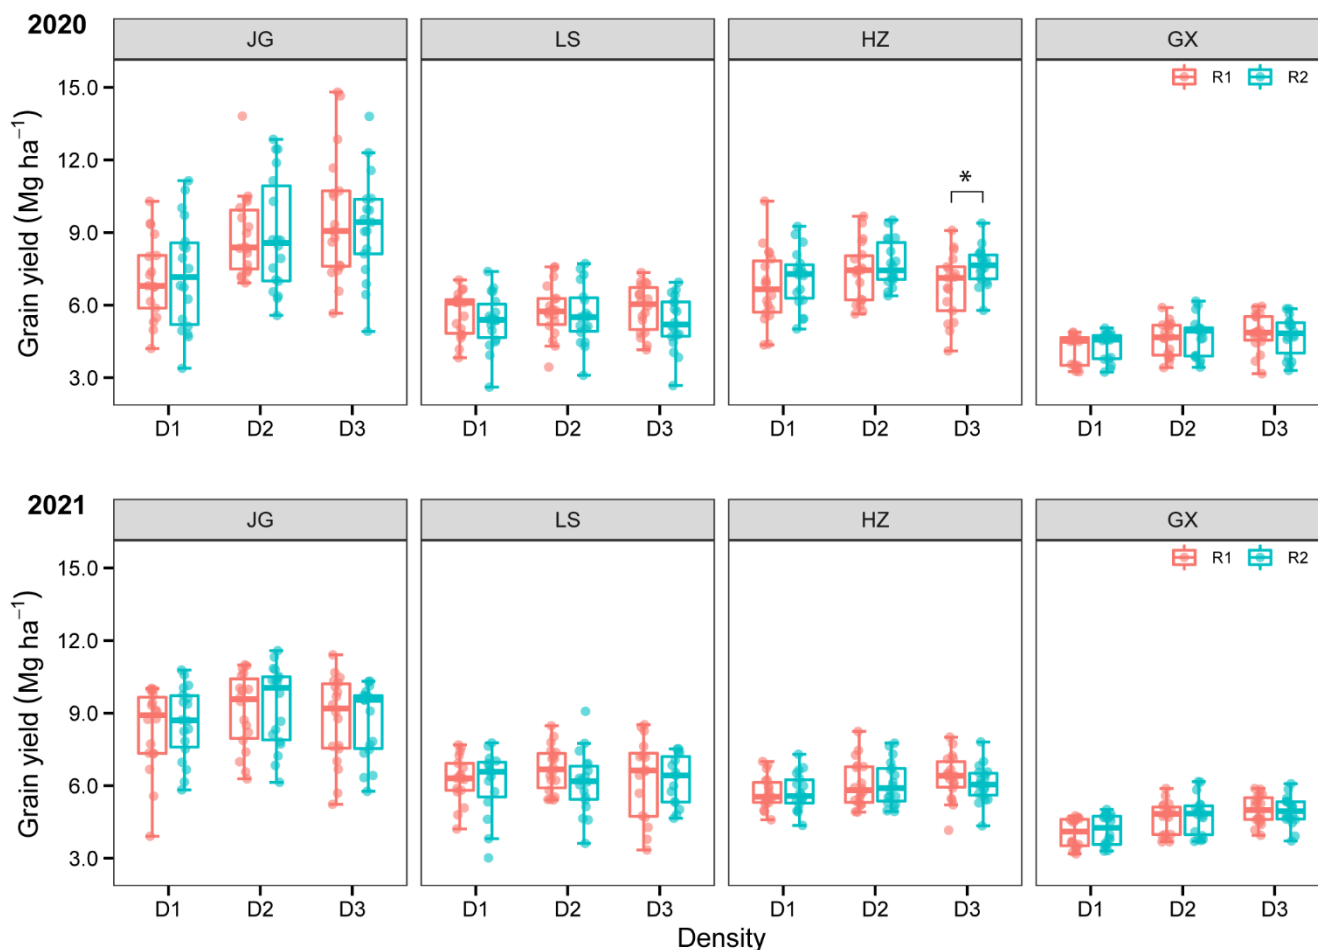

Supplement: Image_1.pdf [file Image_1.pdf]
